# Supplementary material for: Layered Zn2[Co(CN)6](CH3COO) double metal cyanide: a two-dimensional DMC phase with excellent catalytic performance
Source: Royal Society of Chemistry journal article supplement (doi:10.1039/c9sc00527g), 2019-01-01
Supplement: c9sc00527g1.pdf [file c9sc00527g1.pdf]

SUPPORTING INFORMATION

Layered  $Zn_2[Co(CN)_6](CH_3COO)$  double metal cyanide: a two-dimensional DMC phase with excellent catalytic performance

Carlos Marquez,<sup>a</sup> Arkadiy Simonov,<sup>b</sup> Michael T. Wharmby,<sup>c</sup> Cédric Van Goethem,<sup>a</sup> Ivo Vankelecom,<sup>a</sup> Bart Bueken,<sup>a</sup> Andraž Krajnc,<sup>d</sup> Gregor Mali,<sup>d</sup> Dirk De Vos<sup>\*a</sup> and Trees De Baerdemaeker<sup>\*a</sup>

<sup>a</sup> Centre for Surface Chemistry and Catalysis, KU Leuven, Celestijnenlaan 200F p.o. box 2461, 3001 Leuven, Belgium.

<sup>b</sup> Inorganic Chemistry Laboratory, University of Oxford, South Parks Road, Oxford OX1 3QR, United Kingdom.

<sup>c</sup> Deutsches Elektronen-Synchrotron (DESY), Notkestraße 85, 22607 Hamburg, Germany.

<sup>d</sup> Department of Inorganic Chemistry and Technology, National Institute of Chemistry, Hajdrihova 19, 1001 Ljubljana, Slovenia.

\*Corresponding authors: dirk.devos@kuleuven.be; trees.debaerdemaeker@kuleuven.be.

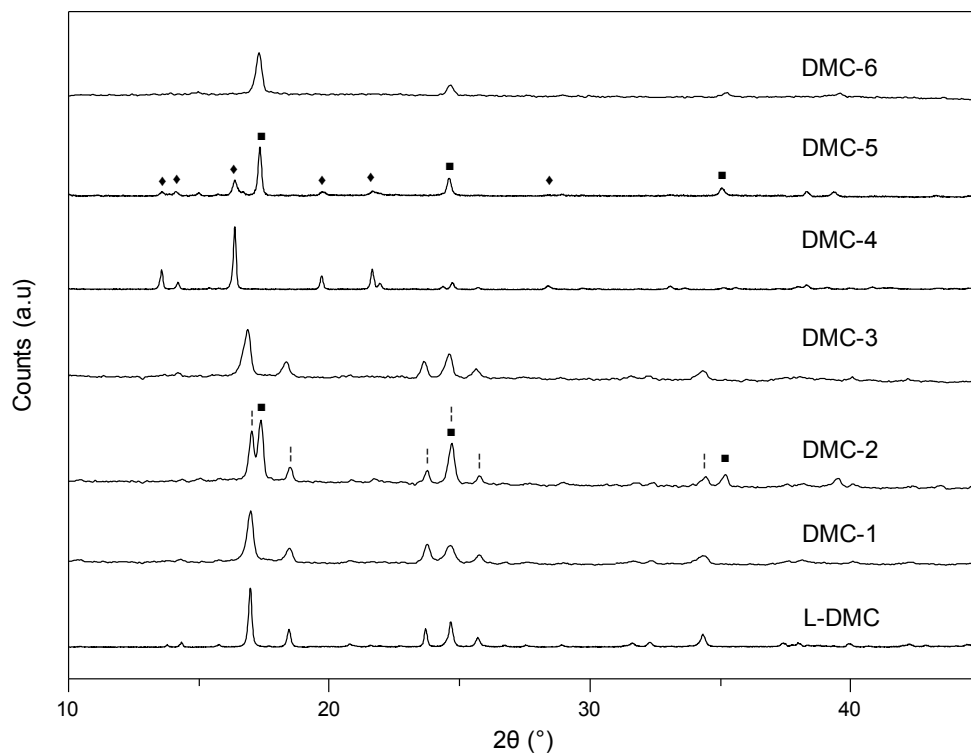

Fig. S1. XRD patterns of L-DMC and the different synthesized DMCs. Reflections corresponding to the cubic phase are denoted by (■), reflections corresponding to the layered phase are denoted by (|) and reflections corresponding to the rhombohedral phase are denoted by (♦). The PXRD patterns of L-DMC, DMC-4 and DMC-5 were recorded on a Malvern PANalytical Empyrean diffractometer ( $\text{CuK}_{\alpha 1,2}$  radiation). The other PXRD data were collected on a STOE Stadi MP diffractometer ( $\text{CuK}_{\alpha 1}$  radiation).

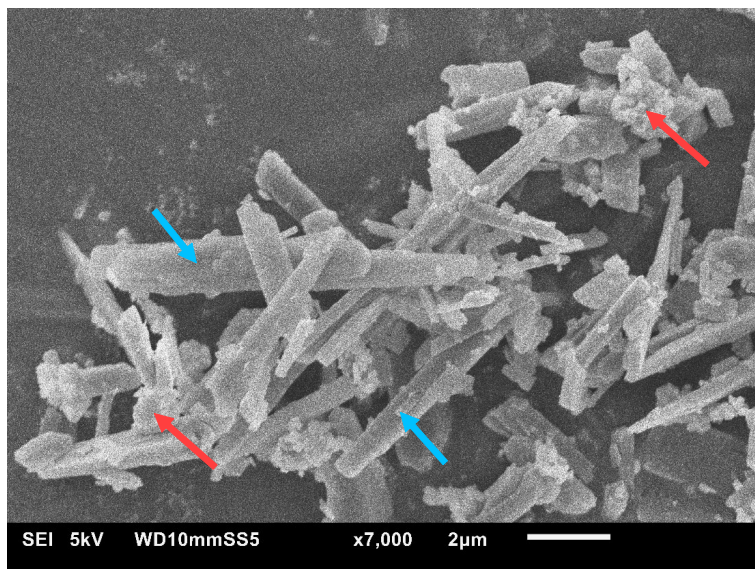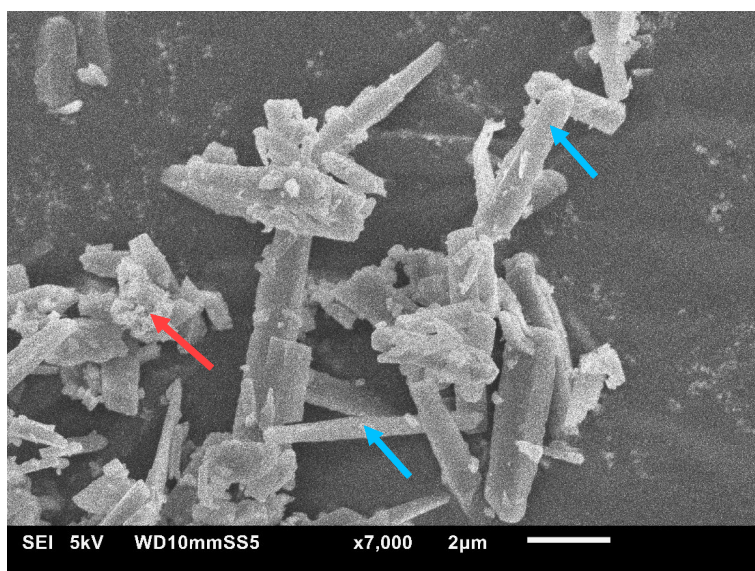

Fig. S2. SEM images of DMC-1. Two phases with different morphologies are discerned. Red arrows indicate the cubic phase and blue arrows indicate the layered phase.

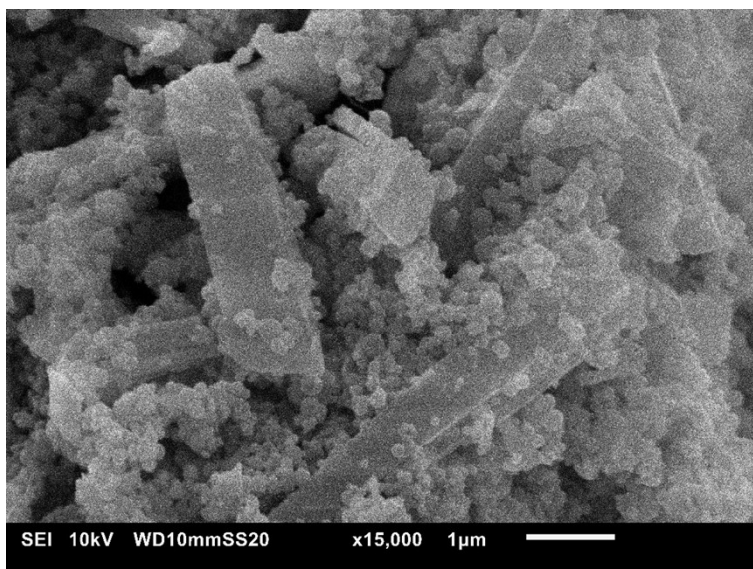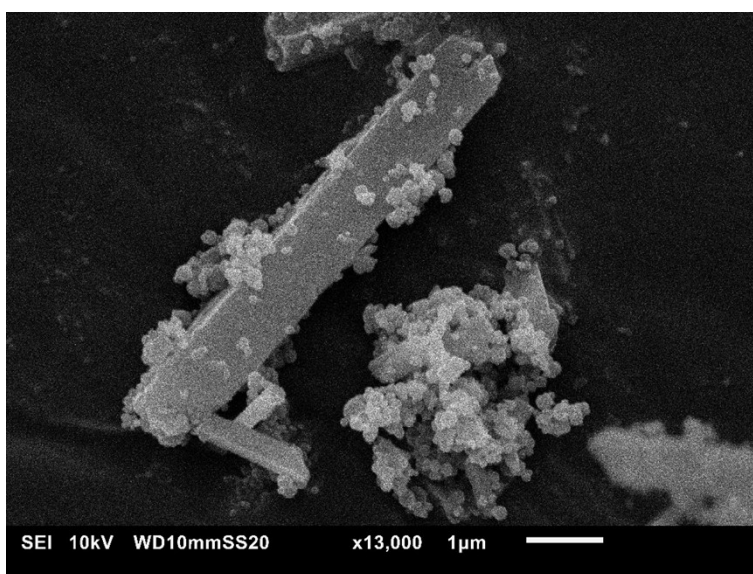

Fig. S3. SEM images of DMC-2. Two phases with different morphologies are clearly discerned.

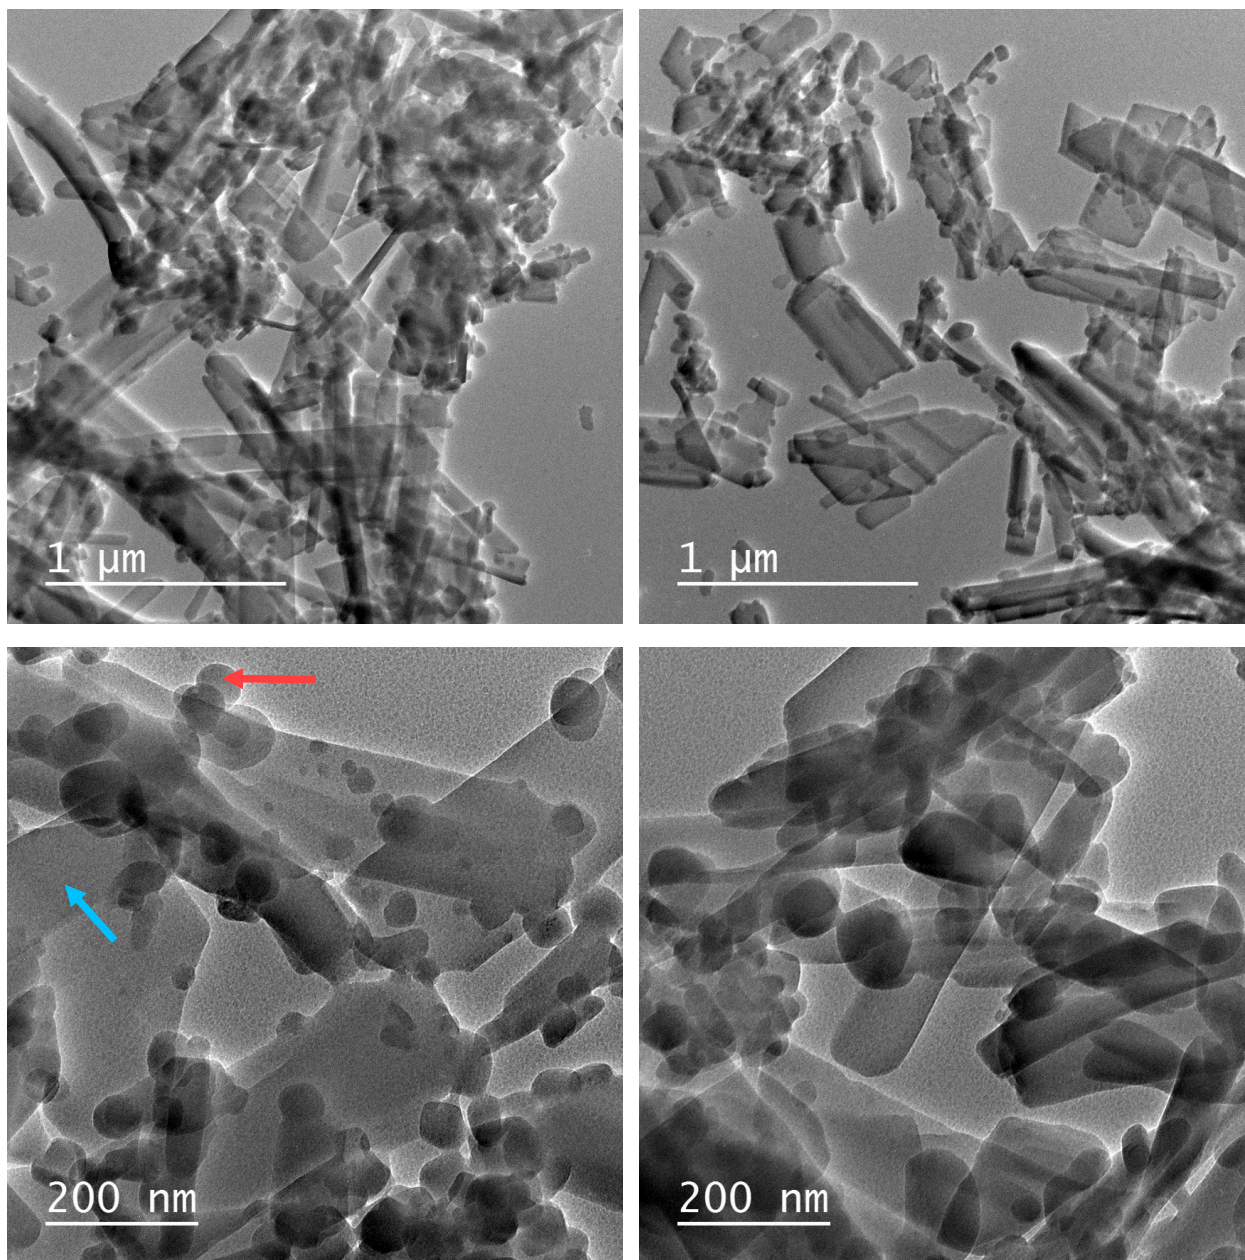

Fig. S4. TEM images of DMC-3. Two phases with different morphologies are clearly discerned. EDX analyses of the area signalized by a red arrow gave a Zn:Co molar ratio of 1.8 (close to the theoretical composition of the phase  $\text{Zn}_3[\text{Co}(\text{CN})_6]_2$ ). EDX analyses of the area signalized by a blue arrow gave a Zn:Co molar ratio of 2.0 (coinciding with the theoretical composition of the layered phase).

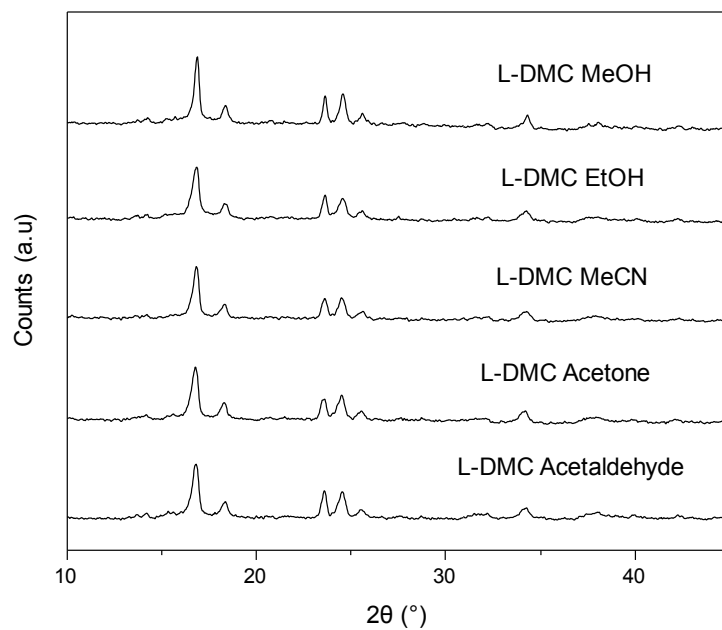

Fig. S5. XRD patterns of L-DMC after the AMOS dispersion procedure collected on a STOE Stadi MP diffractometer ( $\text{CuK}_{\alpha 1}$  radiation).

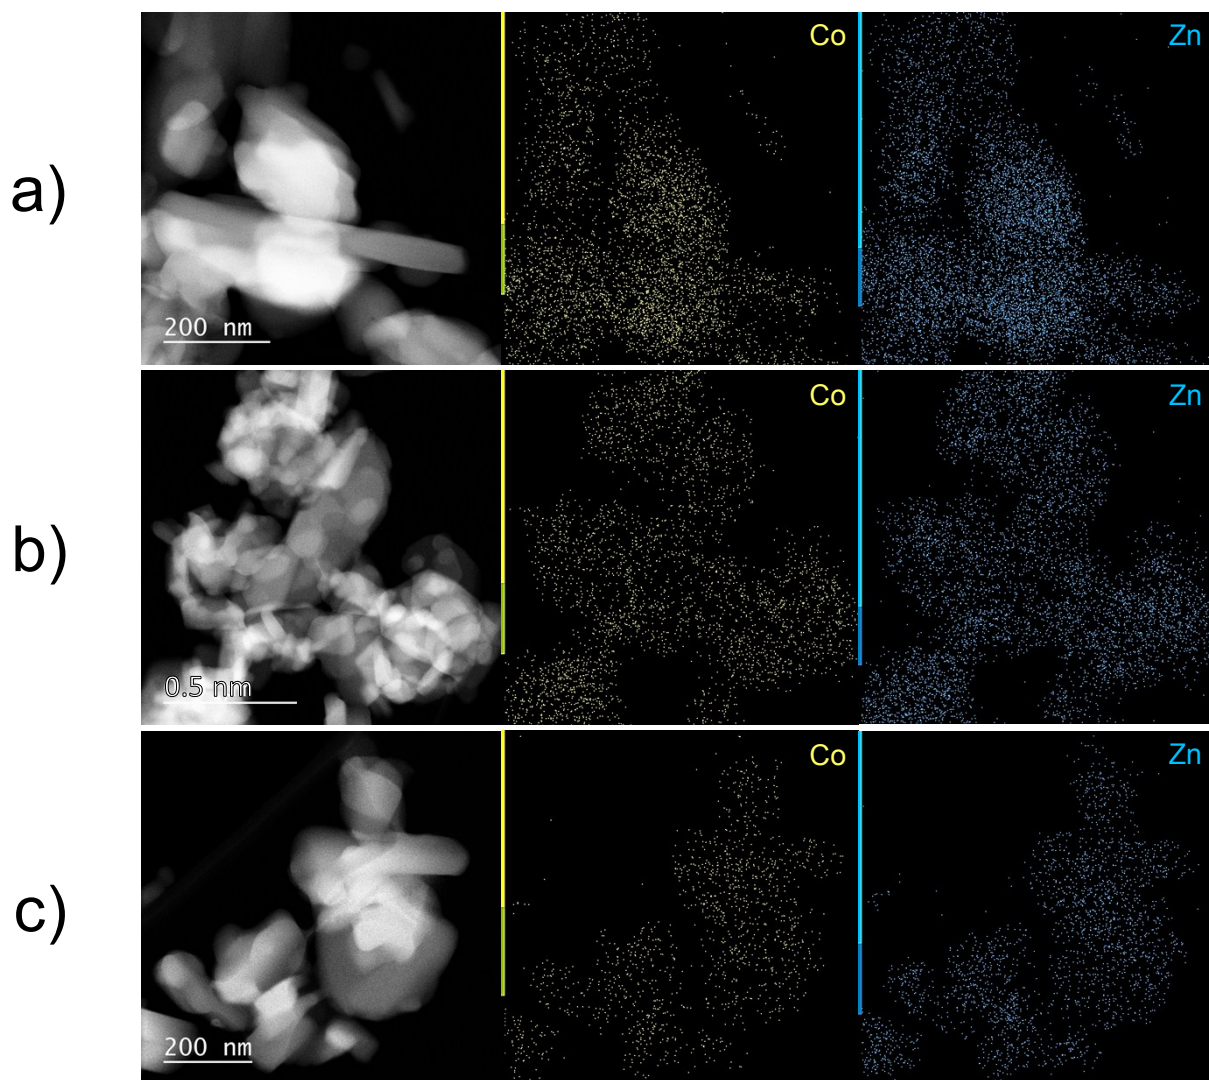

Fig. S6. HAADF-STEM images and EDX composition map for Co and Zn of three different areas (a, b and c) of L-DMC. EDX analyses of each area gave a Zn:Co molar ratio of 2.0 (coinciding with the theoretical composition of the layered phase).

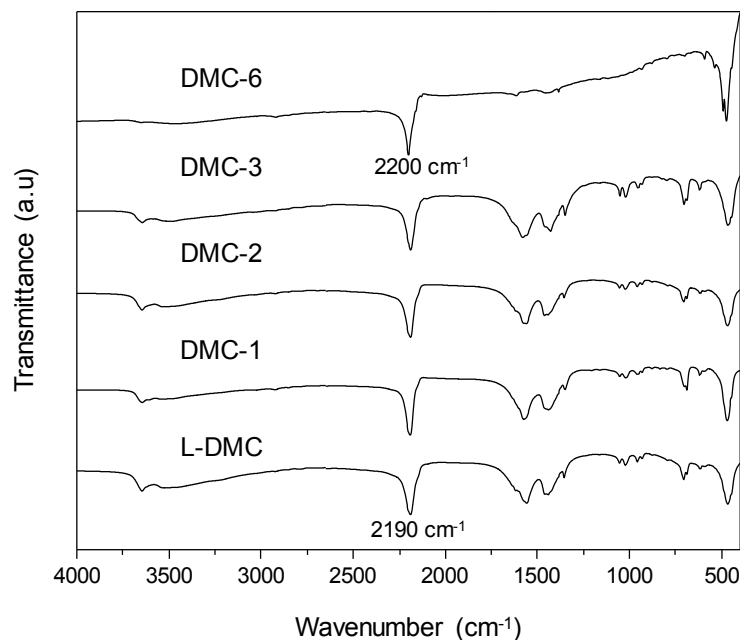

Fig. S7. FTIR spectra of selected samples.

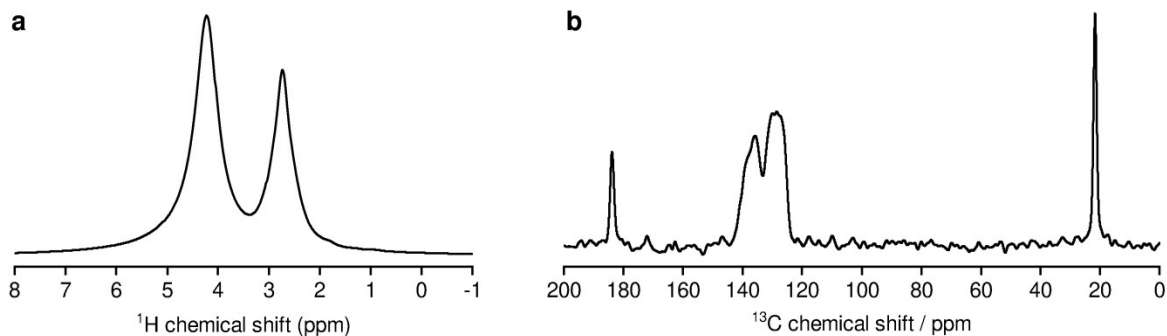

Fig. S8.  $^1\text{H}$  MAS (a) and  $^{13}\text{C}$  MAS (b) NMR spectra of L-DMC. The latter spectrum was recorded using Hahn-echo sequence with  $90^\circ$  and  $180^\circ$  pulses of  $2.0\ \mu\text{s}$  and  $4.0\ \mu\text{s}$ , respectively, and inter-pulse delay of  $25\ \mu\text{s}$ . Repetition delay between consecutive scans was  $120\ \text{s}$  and the number of accumulated scans was 1870. During the acquisition of the signal, high-power heteronuclear decoupling was applied. Integrated intensities of the  $^{13}\text{C}$  MAS NMR signals better reflect the cyanide:acetate ratio than the intensities of the  $^1\text{H}$ - $^{13}\text{C}$  CPMAS NMR signals. We compared the intensities of the  $-\text{CH}_3$  signal of acetate and the total cyanide signal, and obtained the cyanide:acetate ratio of 4.1. The disagreement between this value and the theoretical composition of L-DMC (cyanide:acetate ratio of 6) is mainly due to the very slow spin-lattice relaxation of the cyanide  $^{13}\text{C}$  magnetization. With the repetition delay of  $120\ \text{s}$ ,  $^{13}\text{C}$  magnetization of cyanides could not be completely recovered, and therefore the corresponding NMR signals were partly suppressed.



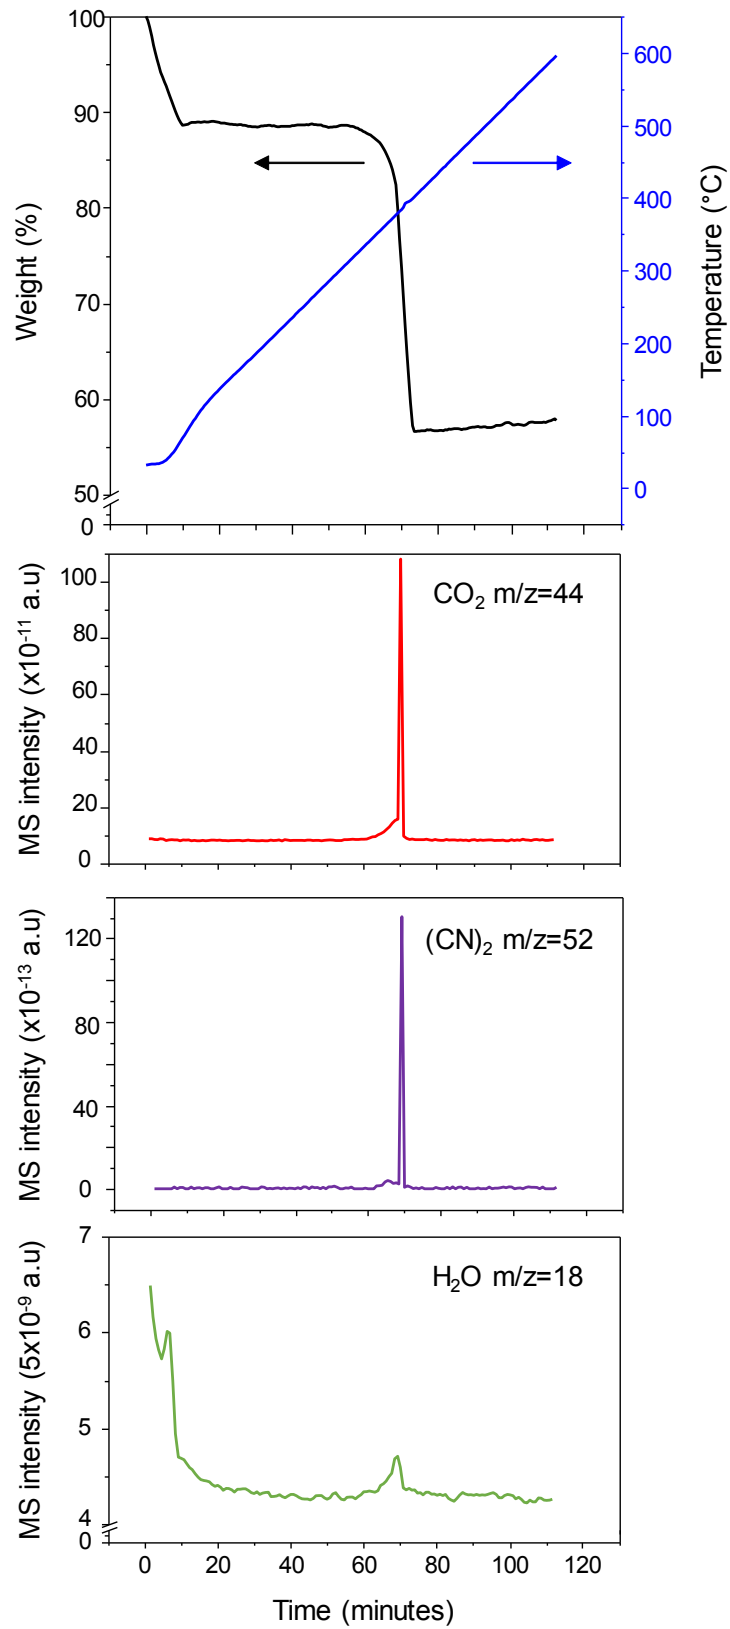

Fig S9. TG-MS analysis for L-DMC.

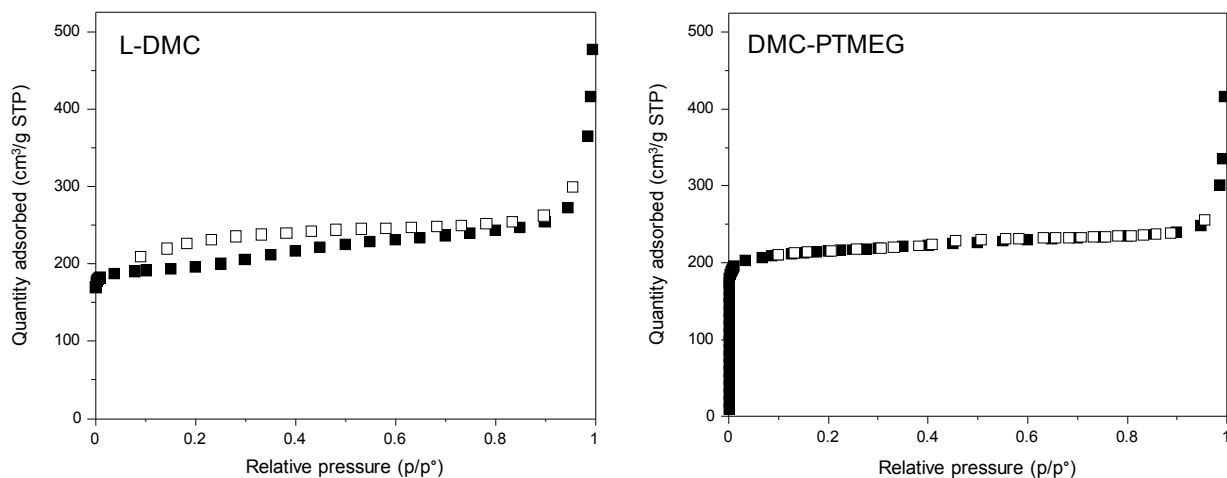

Fig. S10. Nitrogen physisorption isotherms of L-DMC and DMC-PTMEG (-196°C). Filled symbols denote adsorption and open symbols denote desorption.

Table S1. Textural properties determined from N<sub>2</sub> physisorption at -196°C of the L-DMC and DMC-PTMEG.

| Sample    | $S_{\text{BET}}$ (m <sup>2</sup> /g) | $S_{\text{ext}}$ (m <sup>2</sup> /g) |
|-----------|--------------------------------------|--------------------------------------|
| DMC-PTMEG | 652                                  | 112                                  |
| L-DMC     | 784                                  | 123                                  |

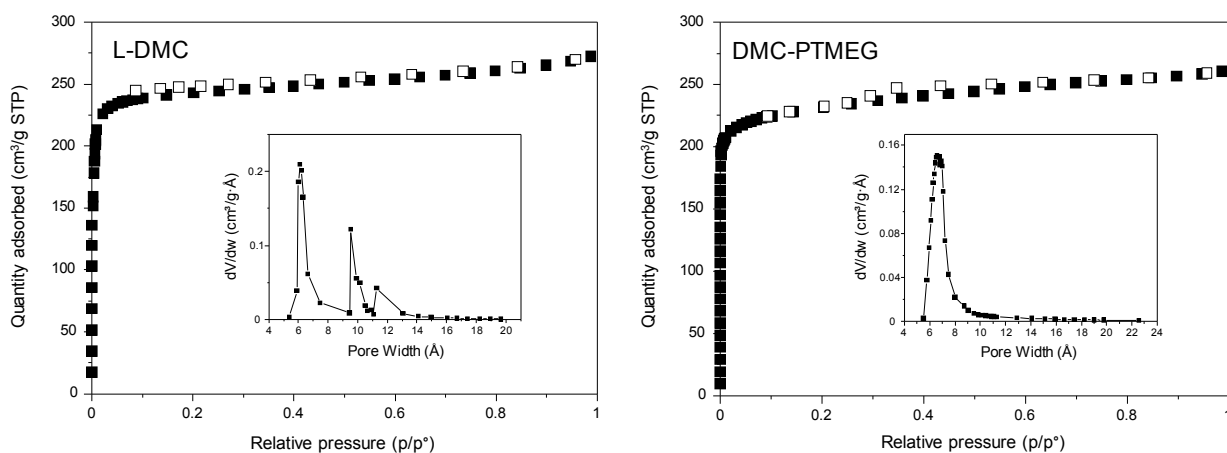

Fig. S11. Argon physisorption isotherms of L-DMC and DMC-PTMEG (-196°C). Filled symbols denote adsorption and open symbols denote desorption. Inset: Micropore size distribution estimated by the Horvath–Kawazoe method.

Table S2. Conversion of phenylacetylene and yield of the hydroamination product for selected DMC samples.

| Catalyst | 4 h                |                      | 24 h               |                      |
|----------|--------------------|----------------------|--------------------|----------------------|
|          | X (%) <sup>a</sup> | Y (%) <sup>b,c</sup> | X (%) <sup>a</sup> | Y (%) <sup>b,c</sup> |
| L-DMC    | 70                 | 62                   | >99                | 87                   |
| DMC-1    | 10                 | 9                    | 31                 | 25                   |
| DMC-3    | 55                 | 45                   | 97                 | 80                   |
| DMC-4    | 2                  | 2                    | 10                 | 10                   |
| DMC-5    | 35                 | 26                   | 81                 | 65                   |
| DMC-6    | 43                 | 36                   | 80                 | 65                   |

<sup>a</sup> Conversion of phenylacetylene. <sup>b</sup> Yield of the hydroamination product based on phenylacetylene. <sup>c</sup> Acetophenone was the only side-product detected. Reaction conditions: phenylacetylene (0.5 mmol), 4-isopropylaniline (1 mmol), toluene (1 ml) as solvent and tetradecane (1 mmol) as internal standard, 50 mol% Zn, 110°C.

Table S3. Comparison of L-DMC with other Lewis acid catalysts.

| Catalysts                | X (%) <sup>a</sup> | Y (%) <sup>b,c</sup> | $r_0$ (mmol/h) <sup>d</sup> |
|--------------------------|--------------------|----------------------|-----------------------------|
| L-DMC                    | >99                | 87                   | 0.87                        |
| DMC-PTMEG                | 98                 | 82                   | 0.06                        |
| Zn/BEA <sup>e</sup>      | 75                 | 40                   | 0.04                        |
| [Zn-Al] LDH <sup>f</sup> | 16                 | 12                   | <0.01                       |
| [Zn-Al] MMO <sup>f</sup> | 13                 | 11                   | <0.01                       |
| ZnO <sup>g</sup>         | 6                  | 4                    | <0.01                       |

<sup>a</sup> Conversion of phenylacetylene after 24 h reaction time. <sup>b</sup> Yield of the hydroamination product based on phenylacetylene after 24 h reaction time. <sup>c</sup> Acetophenone was the only side-product detected. <sup>d</sup> Initial reaction rate of hydroamination reaction expressed as mmol of imine produced per h. <sup>e</sup> The solid was prepared by impregnation of a commercial Beta zeolite (CP811BL25, Si/Al = 12.5) with ZnCl<sub>2</sub> (Zn wt.% = 11%). <sup>f</sup> The solids were synthesized following literature procedures [1,2]. [Zn-Al] layered double hydroxide, Zn wt.% = 35% and [Zn-Al] mixed metal oxide, Zn wt.% = 53%. <sup>g</sup> ZnO nanoparticles 40-100 nm (Alfa Aesar), Zn wt.% = 80%. Reaction conditions: phenylacetylene (0.5 mmol), 4-isopropylaniline (1 mmol), toluene (1 ml) as solvent and tetradecane (1 mmol) as internal standard, 50 mol% Zn, 110°C.

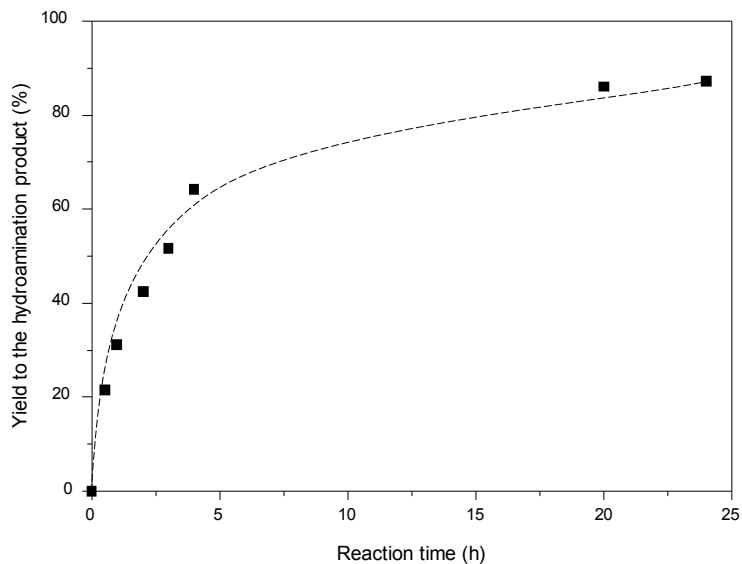

Fig. S12. Yield to hydroamination product vs. time plot. Reaction conditions: phenylacetylene (0.5 mmol), 4-isopropylaniline (1 mmol), toluene (1 ml) as solvent and tetradecane (1 mmol) as internal standard, 50 mol% Zn, 110°C.

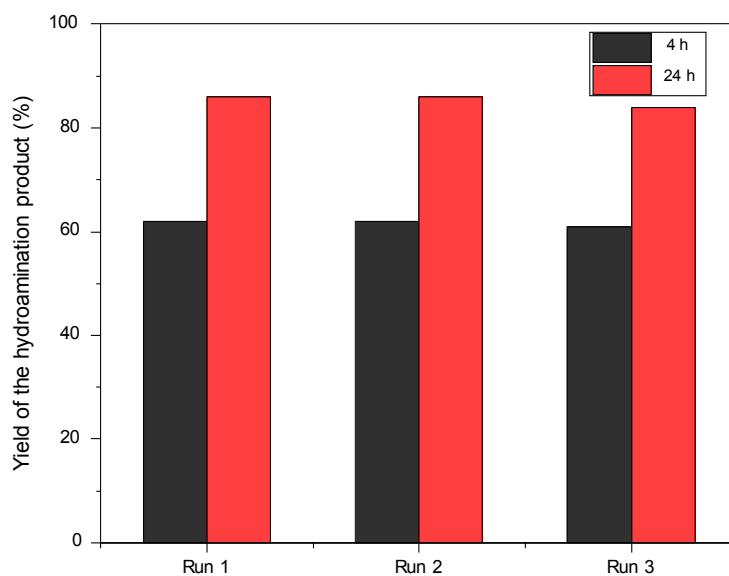

Fig. S13. L-DMC Recycling test. Full phenylacetylene conversion was achieved in each run after 24 h reaction time. Reaction conditions: phenylacetylene (0.5 mmol), 4-isopropylaniline (1 mmol), toluene (1 ml) as solvent and tetradecane (1 mmol) as internal standard, 50 mol% Zn, 110°C.

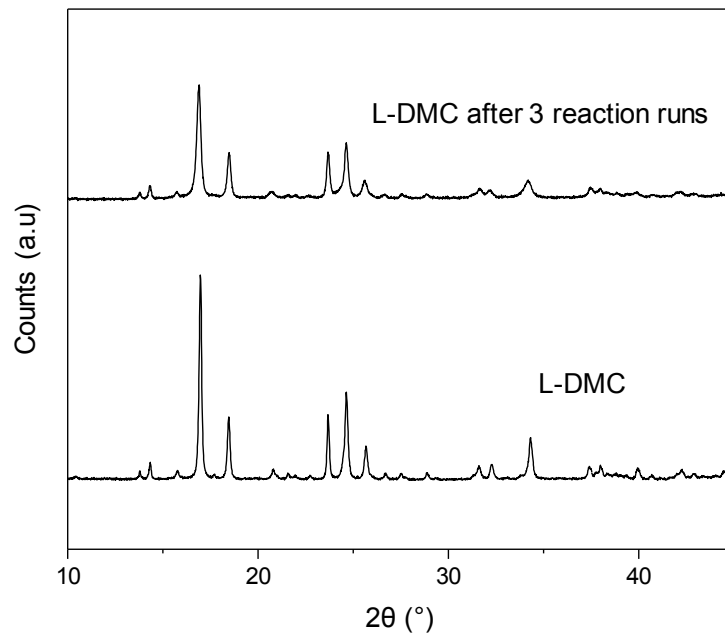

Fig. S14. XRD pattern of L-DMC before and after 3 reaction runs. Reaction conditions: phenylacetylene (0.5 mmol), 4-isopropylaniline (1 mmol), toluene (1 ml) as solvent and tetradecane (1 mmol) as internal standard, 50 mol% Zn, 110°C, 24 h.

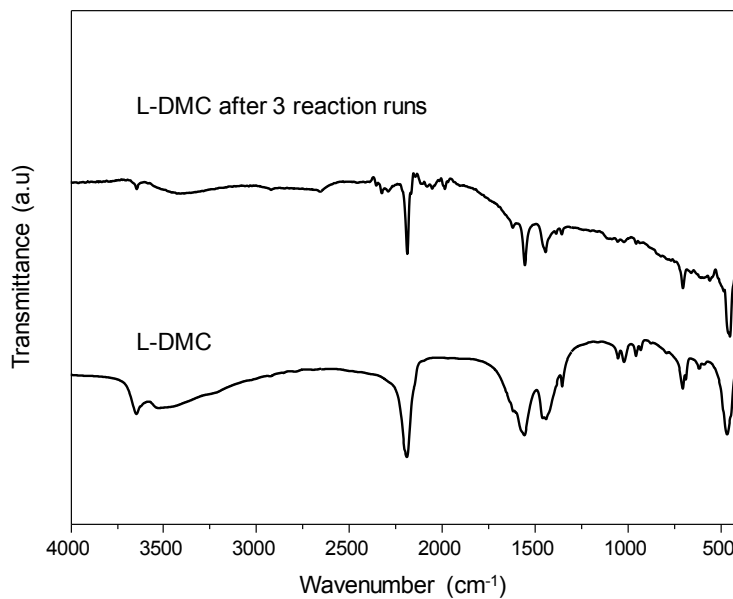

Fig. S15. FTIR spectra of L-DMC before and after 3 reaction runs. Reaction conditions: phenylacetylene (0.5 mmol), 4-isopropylaniline (1 mmol), toluene (1 ml) as solvent and tetradecane (1 mmol) as internal standard, 50 mol% Zn, 110°C, 24 h.

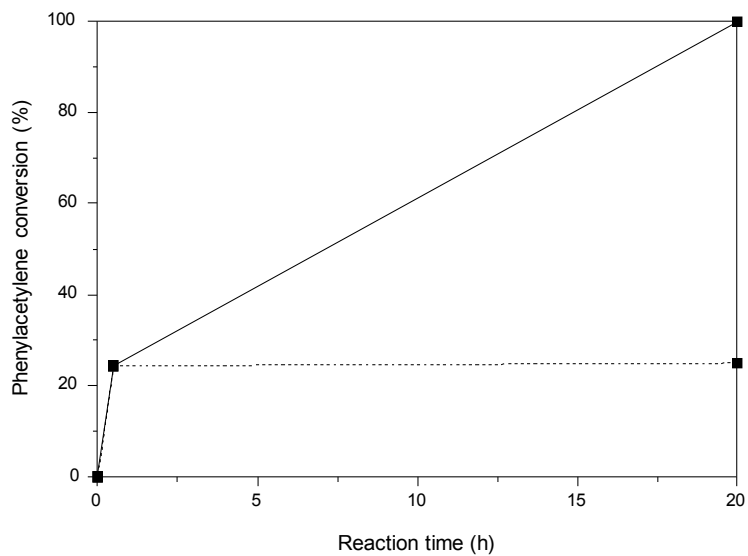

Fig. S16. L-DMC hot filtration test. Dashed line represents the conversion after removal of the catalyst. Reaction conditions: phenylacetylene (0.5 mmol), 4-isopropylaniline (1 mmol), toluene (1 ml) as solvent and tetradecane (1 mmol) as internal standard, 50 mol% Zn, 110°C.

## References

1. K. Abderrazek, F. Srasra Najoua, E. Srasra, *Appl. Clay Sci.*, 2016, **119**, 229–235.
2. T-T. H. Nguyen, X-T. Thi Nguyen, C. Q. Nguyen, P. H. Tran, *Heliyon*, 2018, **4**, e00966.
